# Supplementary material for: Self-assembled composite nanoparticles based on zein as delivery vehicles of curcumin: role of chondroitin sulfate
Source: Royal Society of Chemistry journal article supplement (doi:10.1039/d0fo00964d), 2020-01-01
Supplement: d0fo00964d1.pdf [file d0fo00964d1.pdf]

## Supporting Information

### **Self-assembled composite nanoparticles based on zein as delivery vehicles of curcumin: Role of chondroitin sulfate**

Yongkai Yuan,<sup>a</sup> Chengzhen Liu,<sup>a</sup> Mengjie Ma,<sup>b</sup> Shuaizhong Zhang,<sup>a</sup> Shuhui Wang,<sup>c</sup>

Hao Li,<sup>a</sup> Ying Xu<sup>a,\*</sup> and Dongfeng Wang<sup>a</sup>

<sup>a</sup> College of Food Science and Engineering, Ocean University of China, Qingdao,  
Shandong Province, 266003, People's Republic of China

<sup>b</sup> School of Medicine and Pharmacy, Ocean University of China, Qingdao, Shandong  
Province, 266003, People's Republic of China

<sup>c</sup> Qingdao Municipal Center for Disease Control and Prevention & Qingdao Institute  
of Prevention Medicine, Shandong Province, 266033, People's Republic of China

\* Corresponding author: Ying Xu

Telephone: +860532-82031575

E-mail: [xuy@ouc.edu.cn](mailto:xuy@ouc.edu.cn)

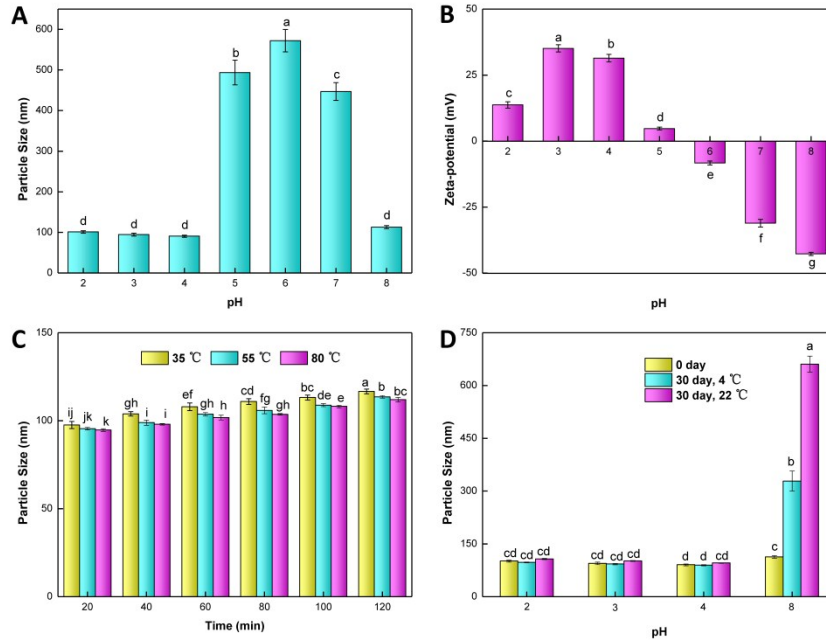

**Fig. S1** Particle size (A) and zeta-potential (B) of Cur-ZNPs with different pH. (C) Particle size of Cur-ZNPs at pH 4.0 with heating at 35, 55 and 80 °C respectively for 120 min. The thermostability of Cur-ZNPs at pH 6.0 was not presented due to the aggregates appeared initially. (E) Particle size of Cur-ZNPs with storage at 4 °C and 22 °C respectively for 30 day. The storage stability of Cur-ZNPs at pH 5.0–7.0 was not presented due to the aggregates appeared initially.
